# Supplementary material for: The genome of the simian and human malaria parasite Plasmodium knowlesi
Source: Springer Nature journal article supplement (doi:10.1038/nature07306), 2008-10-01
Supplement: nature07306-s8.pdf [file nature07306-s8.pdf]

Supplementary Table 10

| <i>P. knowlesi</i><br>protein identifiers | Match type  | Host protein identifiers      | Match<br>Length     | Match<br>start* | Match<br>end* | Match sequence | BLAST<br>e-values             |         |
|-------------------------------------------|-------------|-------------------------------|---------------------|-----------------|---------------|----------------|-------------------------------|---------|
| PKH_080655                                | KIR to CD99 | <i>Cercopithecus aethiops</i> | O02788_CERA         | 22              | 36            | 57             | ATPKKPSAGDDFDLGDVAVDGG        | 4.3e-06 |
| PKH_051350                                | "           | "                             | O02788_CERA         | 21              | 38            | 58             | PKKPSAGDDFDLGDVAVDGGN         | 8.9e-06 |
| PKH_082320                                | "           | "                             | O02788_CERA         | 21              | 38            | 58             | PKKPSAGDDFDLGDVAVDGGN         | 8.9e-06 |
| PKH_081600                                | "           | "                             | O02788_CERA         | 18              | 70            | 87             | KPNPNPQAGSSGSFSDA             | 5.6e-04 |
| PKH_112420                                | "           | "                             | O02788_CERA         | 16              | 70            | 85             | KPNPNPQAGSSGSFSDA             | 7.6e-03 |
| PKH_114580                                | "           | "                             | O02788_CERA         | 15              | 93            | 107            | VSGGEGKGGSDGGGS               | 5.1e-02 |
| PKH_080655                                | "           | <i>M. mulatta</i>             | ENSMMUP00000024593  | 22              | 20            | 41             | ATPKKPSAGDDFDLGDVAVDGG        | 2.9e-08 |
| PKH_082320                                | "           | "                             | ENSMMUP00000024593  | 22              | 22            | 43             | PKKPSAGDDFDLGDVAVDGGNE        | 1.8e-08 |
| PKH_051350                                | "           | "                             | ENSMMUP00000024593  | 21              | 22            | 42             | PKKPSAGDDFDLGDVAVDGGN         | 6.1e-08 |
| PKH_081600                                | "           | "                             | ENSMMUP00000024593  | 18              | 56            | 73             | KPNPNPQAGSSGSFSDA             | 3.8e-06 |
| PKH_114580                                | "           | "                             | ENSMMUP00000024593  | 17              | 79            | 95             | VSGGEGKGGSDGGGSHR             | 1.2e-05 |
| PKH_112420                                | "           | "                             | ENSMMUP00000024593  | 16              | 56            | 71             | KPNPNPQAGSSGSFSDA             | 6.2e-05 |
| PKH_031990                                | "           | "                             | ENSMMUP00000024593  | 15              | 86            | 100            | GGSDGGGSHRKEGEE               | 1.8e-04 |
| PKH_051350                                | "           | <i>Human</i>                  | Q6ICV7_HUMAN        | 19              | 44            | 62             | PKKPSAGDDFDLGDVAVDG           | 2.3e-04 |
| PKH_080655                                | "           | "                             | Q6ICV7_HUMAN        | 19              | 44            | 62             | PKKPSAGDDFDLGDVAVDG           | 2.3e-04 |
| PKH_082320                                | "           | "                             | Q6ICV7_HUMAN        | 19              | 44            | 62             | PKKPSAGDDFDLGDVAVDG           | 2.3e-04 |
| PKH_114580                                | "           | "                             | Q6ICV7_HUMAN        | 17              | 99            | 115            | VSGGEGKGGSDGGGSHR             | 2.6e-03 |
| PKH_031990                                | "           | "                             | Q6ICV7_HUMAN        | 15              | 106           | 120            | GGSDGGGSHRKEGEE               | 3.7e-02 |
| PKH_051350                                | KIR to AHNK | <i>M. mulatta</i>             | ENSMMUP00000037351  | 33              | 2181          | 2213           | LPKADIDVSGPKVDIDVPDNIPEGKLGPK | 3.4e-12 |
| "                                         | "           | "                             | ENSMMUP00000037351  | 25              | 3091          | 3115           | LPKADIDVSGPKVDIDVPDNIPEG      | 1.2e-07 |
| "                                         | "           | "                             | ENSMMUP00000037351  | 21              | 2975          | 2995           | VDIDVPDNIPEGKLGPK             | 1.3e-05 |
| "                                         | "           | "                             | ENSMMUP00000037351  | 19              | 2767          | 2785           | DVSGPKVDIDVPDNIPEG            | 1.9e-04 |
| "                                         | "           | "                             | ENSMMUP00000037351  | 19              | 3353          | 3371           | DVSGPKVDIDVPDNIPEG            | 1.9e-04 |
| "                                         | "           | "                             | ENSMMUP00000037351  | 18              | 2107          | 2124           | LKGPVKGDVDSLPKVE              | 2.2e-03 |
| "                                         | "           | "                             | ENSMMUP00000037351  | 18              | 1723          | 1740           | LKGPVKGDVDSLPKVE              | 2.2e-03 |
| "                                         | "           | "                             | ENSMMUP00000037351  | 18              | 1851          | 1868           | LKGPVKGDVDSLPKVE              | 2.2e-03 |
| "                                         | "           | "                             | ENSMMUP00000037351  | 18              | 2235          | 2252           | LKGPVKGDVDSLPKVE              | 2.2e-03 |
| "                                         | "           | "                             | ENSMMUP00000037351  | 18              | 2889          | 2906           | LKGPVKGDVDSLPKVE              | 2.2e-03 |
| "                                         | "           | "                             | ENSMMUP00000037351  | 18              | 3273          | 3290           | LKGPVKGDVDSLPKVE              | 2.2e-03 |
| "                                         | "           | "                             | ENSMMUP00000037351  | 18              | 3401          | 3418           | LKGPVKGDVDSLPKVE              | 2.2e-03 |
| "                                         | "           | "                             | ENSMMUP00000037351  | 18              | 3865          | 3882           | LKGPVKGDVDSLPKVE              | 2.2e-03 |
| "                                         | "           | "                             | ENSMMUP00000037351  | 17              | 436           | 452            | VPDNIPEGKLGPK                 | 1.7e-03 |
| "                                         | "           | "                             | ENSMMUP00000037351  | 16              | 1814          | 1829           | PDVNIPEGKLGPK                 | 4.5e-03 |
| "                                         | "           | "                             | ENSMMUP00000037351  | 16              | 2687          | 2702           | LKGPVKGDVDSLPK                | 1.9e-02 |
| "                                         | "           | "                             | ENSMMUP00000037351  | 16              | 3145          | 3160           | LKGPVKGDVDSLPK                | 1.9e-02 |
| "                                         | "           | "                             | ENSMMUP00000037351  | 16              | 3219          | 3234           | LPKADIDVSGPKVDID              | 1.9e-02 |
| "                                         | "           | "                             | ENSMMUP00000037351  | 16              | 3817          | 3832           | DVSGPKVDIDVPDNI               | 0.36    |
| "                                         | "           | "                             | ENSMMUP00000037351  | 15              | 1797          | 1811           | LPKADIDVSGPKVDI               | 8.4e-02 |
| "                                         | "           | "                             | ENSMMUP00000037351  | 15              | 1669          | 1683           | LPKADIDVSGPKVDI               | 8.4e-02 |
| "                                         | "           | "                             | ENSMMUP00000037351  | 15              | 2053          | 2067           | LPKADIDVSGPKVDI               | 8.4e-02 |
| PKH_051350                                | "           | <i>Human</i>                  | Q6ZQN2_HUMAN        | 19              | 225           | 243            | DVSGPKVDIDVPDNIPEG            | 1.0e-02 |
| "                                         | "           | "                             | Q6ZQN2_HUMAN        | 18              | 273           | 290            | LKGPVKGDVDSLPKVE              | 0.12    |
| "                                         | "           | "                             | Q6ZQN2_HUMAN        | 18              | 401           | 418            | LKGPVKGDVDSLPKVE              | 0.12    |
| "                                         | "           | "                             | Q6ZQN2_HUMAN        | 18              | 475           | 492            | LKGPVKGDVDSLPKVE              | 0.12    |
| "                                         | "           | "                             | Q6ZQN2_HUMAN        | 16              | 438           | 453            | PDVNIPEGKLGPK                 | 0.24    |
| "                                         | "           | "                             | Q6ZQN2_HUMAN        | 16              | 17            | 32             | LKGPVKGDVDSLPK                | 1.1     |
| "                                         | "           | "                             | Q6ZQN2_HUMAN        | 16              | 91            | 106            | LPKADIDVSGPKVDID              | 1.1     |
| "                                         | "           | "                             | Q13727_HUMAN        | 19              | 106           | 124            | DVSGPKVDIDVPDNIPEG            | 2.5e-03 |
| "                                         | "           | "                             | Q13727_HUMAN        | 18              | 154           | 171            | LKGPVKGDVDSLPKVE              | 3e-02   |
| "                                         | "           | "                             | Q13727_HUMAN        | 18              | 282           | 299            | LKGPVKGDVDSLPKVE              | 3e-02   |
| "                                         | "           | "                             | Q13727_HUMAN        | 18              | 356           | 373            | LKGPVKGDVDSLPKVE              | 3e-02   |
| "                                         | "           | "                             | Q13727_HUMAN        | 16              | 319           | 334            | PDVNIPEGKLGPK                 | 6.3e-02 |
| "                                         | "           | "                             | Q8N274_HUMAN        | 18              | 677           | 694            | LKGPVKGDVDSLPKVE              | 4.9e-02 |
| "                                         | "           | "                             | Q8N274_HUMAN        | 16              | 215           | 230            | LKGPVKGDVDSLPK                | 0.45    |
| "                                         | "           | "                             | Q8N274_HUMAN        | 16              | 640           | 655            | PDVNIPEGKLGPK                 | 0.10    |
| "                                         | "           | "                             | Q8N274_HUMAN        | 16              | 768           | 783            | PDVNIPEGKLGPK                 | 0.10    |
| "                                         | "           | "                             | Q8N274_HUMAN        | 15              | 751           | 765            | LPKADIDVSGPKVDI               | 2.0     |
| "                                         | "           | "                             | AHNK_HUMAN (Q09666) | 27              | 3834          | 3860           | DVSGPKVDIDVPDNIPEGKLGPK       | 1.0e-06 |
| "                                         | "           | "                             | AHNK_HUMAN (Q09666) | 27              | 3052          | 3078           | DVSGPKVDIDVPDNIPEGKLGPK       | 1.0e-06 |
| "                                         | "           | "                             | AHNK_HUMAN (Q09666) | 19              | 4218          | 4236           | DVSGPKVDIDVPDNIPEG            | 3.7e-02 |
| "                                         | "           | "                             | AHNK_HUMAN (Q09666) | 18              | 2588          | 2605           | LKGPVKGDVDSLPKVE              | 0.42    |
| "                                         | "           | "                             | AHNK_HUMAN (Q09666) | 18              | 2716          | 2733           | LKGPVKGDVDSLPKVE              | 0.42    |
| "                                         | "           | "                             | AHNK_HUMAN (Q09666) | 18              | 4266          | 4283           | LKGPVKGDVDSLPKVE              | 0.42    |
| "                                         | "           | "                             | AHNK_HUMAN (Q09666) | 18              | 4394          | 4411           | LKGPVKGDVDSLPKVE              | 0.42    |
| "                                         | "           | "                             | AHNK_HUMAN (Q09666) | 18              | 4468          | 4485           | LKGPVKGDVDSLPKVE              | 0.42    |
| "                                         | "           | "                             | AHNK_HUMAN (Q09666) | 17              | 917           | 933            | VPDNIPEGKLGPK                 | 0.33    |
| "                                         | "           | "                             | AHNK_HUMAN (Q09666) | 16              | 2126          | 2141           | LKGPVKGDVDSLPK                | 3.8     |

|            |   |            |                     |    |      |      |                        |         |
|------------|---|------------|---------------------|----|------|------|------------------------|---------|
| "          | " | "          | AHNK_HUMAN (Q09666) | 16 | 2679 | 2694 | PDVNIPEGKLGPK          | 0.88    |
| "          | " | "          | AHNK_HUMAN (Q09666) | 16 | 2935 | 2950 | PDVNIPEGKLGPK          | 0.88    |
| "          | " | "          | AHNK_HUMAN (Q09666) | 16 | 3754 | 3769 | LKGPVKVGDVDSLPG        | 3.8     |
| "          | " | "          | AHNK_HUMAN (Q09666) | 16 | 2551 | 2566 | PDVNIPEGKLGPK          | 0.88    |
| "          | " | "          | AHNK_HUMAN (Q09666) | 16 | 4010 | 4025 | LKGPVKVGDVDSLPG        | 3.8     |
| "          | " | "          | AHNK_HUMAN (Q09666) | 16 | 4084 | 4099 | LPKADIVSGPKVDI         | 3.8     |
| "          | " | "          | AHNK_HUMAN (Q09666) | 16 | 4431 | 4446 | PDVNIPEGKLGPK          | 0.88    |
| PKH_101170 | " | M. mulatta | ENSMMUP00000037351  | 23 | 3355 | 3377 | SGPKVDIVPDNIEGPDALKG   | 3.4e-05 |
| "          | " | "          | ENSMMUP00000037351  | 23 | 3099 | 3121 | SGPKVDIVPDNIEGPDALKG   | 3.4e-05 |
| "          | " | "          | ENSMMUP00000037351  | 23 | 2769 | 2791 | SGPKVDIVPDNIEGPDALKG   | 3.4e-05 |
| "          | " | "          | ENSMMUP00000037351  | 17 | 2189 | 2205 | SGPKVDIVPDVNIIEGP      | 2.2e-03 |
| "          | " | "          | ENSMMUP00000037351  | 16 | 3954 | 3969 | DVPDNIIEGPDALKG        | 9.3e-03 |
| PKH_101170 | " | Human      | Q6ZQN2_HUMAN        | 23 | 227  | 249  | SGPKVDIVPDVNIIEGPDALKG | 7.5e-05 |
| "          | " | "          | Q6ZQN2_HUMAN        | 16 | 698  | 713  | DVPDNIIEGPDALKG        | 0.51    |
| "          | " | "          | Q13727_HUMAN        | 23 | 108  | 130  | SGPKVDIVPDVNIIEGPDALKG | 1.8e-05 |
| "          | " | "          | AHNK_HUMAN (Q09666) | 23 | 4220 | 4242 | SGPKVDIVPDVNIIEGPDALKG | 2.8e-04 |
| "          | " | "          | AHNK_HUMAN (Q09666) | 17 | 3054 | 3070 | SGPKVDIVPDVNIIEGP      | 0.42    |
| "          | " | "          | AHNK_HUMAN (Q09666) | 17 | 3836 | 3852 | SGPKVDIVPDVNIIEGP      | 0.42    |
| "          | " | "          | AHNK_HUMAN (Q09666) | 16 | 3189 | 3204 | DVPDNIIEGPDALKG        | 1.8     |
| "          | " | "          | AHNK_HUMAN (Q09666) | 16 | 4691 | 4706 | DVPDNIIEGPDALKG        | 1.8     |
| "          | " | "          | AHNK_HUMAN (Q09666) | 16 | 3971 | 3986 | DVPDNIIEGPDALKG        | 1.8     |
| "          | " | "          | AHNK_HUMAN (Q09666) | 16 | 3641 | 3656 | DVPDNIIEGPDALKG        | 1.8     |
| "          | " | "          | AHNK_HUMAN (Q09666) | 15 | 1422 | 1436 | VPDNIIEGPDALKG         | 7.9     |

|            |                      |            |                     |    |      |      |                                   |         |
|------------|----------------------|------------|---------------------|----|------|------|-----------------------------------|---------|
| PKH_062020 | SICavar-like to AHNK | M. mulatta | ENSMMUP00000037351  | 33 | 1729 | 1761 | KGDVDSLPGVEGLKGPVEDIKGPVDIDAPD    | 4.3e-12 |
| "          | "                    | "          | ENSMMUP00000037351  | 33 | 1857 | 1889 | KGDVDSLPGVEGLKGPVEDIKGPVDIDAPD    | 4.3e-12 |
| "          | "                    | "          | ENSMMUP00000037351  | 33 | 3091 | 3123 | LPKADIVSGPKVDIVPDVNIIEGPDALKGPK   | 4.3e-12 |
| "          | "                    | "          | ENSMMUP00000037351  | 33 | 3871 | 3903 | KGDVDSLPGVEGLKGPVEDIKGPVDIDAPD    | 4.3e-12 |
| "          | "                    | "          | ENSMMUP00000037351  | 30 | 2113 | 2142 | KGDVDSLPGVEGLKGPVEDIKGPVDI        | 2.7e-10 |
| "          | "                    | "          | ENSMMUP00000037351  | 29 | 2895 | 2923 | KGDVDSLPGVEGLKGPVEDIKGPVDI        | 1.2e-09 |
| "          | "                    | "          | ENSMMUP00000037351  | 28 | 3279 | 3306 | KGDVDSLPGVEGLKGPVEDIKGPVDI        | 3.1e-09 |
| "          | "                    | "          | ENSMMUP00000037351  | 27 | 2767 | 2793 | DVSGPKVDIVPDVNIIEGPDALKGPK        | 6.5e-09 |
| "          | "                    | "          | ENSMMUP00000037351  | 27 | 3353 | 3379 | DVSGPKVDIVPDVNIIEGPDALKGPK        | 6.5e-09 |
| "          | "                    | "          | ENSMMUP00000037351  | 25 | 2181 | 2205 | LPKADIVSGPKVDIVPDVNIIEGP          | 1.2e-07 |
| "          | "                    | "          | ENSMMUP00000037351  | 23 | 3407 | 3429 | KGDVDSLPGVEGLKGPVEDIK             | 2.9e-06 |
| "          | "                    | "          | ENSMMUP00000037351  | 19 | 2832 | 2850 | EGDLKGPVEDIKGPVDI                 | 1.9e-04 |
| "          | "                    | "          | ENSMMUP00000037351  | 18 | 2704 | 2721 | EGDLKGPVEDIKGPVDI                 | 8.1e-04 |
| "          | "                    | "          | ENSMMUP00000037351  | 18 | 3954 | 3971 | DVPDNIIEGPDALKGPK                 | 5.0e-04 |
| "          | "                    | "          | ENSMMUP00000037351  | 16 | 2815 | 2830 | LKGPVKMGDVSLSLPG                  | 1.5e-02 |
| "          | "                    | "          | ENSMMUP00000037351  | 17 | 1067 | 1083 | DVDSLPGVEGLKGPVE                  | 4.5e-03 |
| "          | "                    | "          | ENSMMUP00000037351  | 16 | 3168 | 3183 | PEVDIKGPVDIDAPD                   | 7.3e-03 |
| "          | "                    | "          | ENSMMUP00000037351  | 16 | 3219 | 3234 | LPKADIVSGPKVDI                    | 1.9e-02 |
| "          | "                    | "          | ENSMMUP00000037351  | 16 | 3749 | 3764 | SLPVEGLKGPVEDI                    | 1.9e-02 |
| "          | "                    | "          | ENSMMUP00000037351  | 16 | 3817 | 3832 | DVSGPKVDIVPDVNI                   | 1.5e-02 |
| "          | "                    | "          | ENSMMUP00000037351  | 15 | 1669 | 1683 | LPKADIVSGPKVDI                    | 8.4e-02 |
| "          | "                    | "          | ENSMMUP00000037351  | 15 | 1797 | 1811 | LPKADIVSGPKVDI                    | 8.4e-02 |
| "          | "                    | "          | ENSMMUP00000037351  | 15 | 2053 | 2067 | LPKADIVSGPKVDI                    | 8.4e-02 |
| "          | "                    | Human      | Q6ZQN2_HUMAN        | 36 | 145  | 180  | LKGPVKMGDVSLSLPGVEGLKGPVEDIKGPVDI | 5.6e-12 |
| "          | "                    | "          | Q6ZQN2_HUMAN        | 33 | 279  | 311  | KGDVDSLPGVEGLKGPVEDIKGPVDIDAPD    | 2.2e-10 |
| "          | "                    | "          | Q6ZQN2_HUMAN        | 27 | 225  | 251  | DVSGPKVDIVPDVNIIEGPDALKGPK        | 3.4e-07 |
| "          | "                    | "          | Q6ZQN2_HUMAN        | 19 | 407  | 425  | KGDVDSLPGVEGLKGPVE                | 1.6e-02 |
| "          | "                    | "          | Q6ZQN2_HUMAN        | 18 | 698  | 715  | DVPDNIIEGPDALKGPK                 | 2.7e-02 |
| "          | "                    | "          | Q6ZQN2_HUMAN        | 16 | 621  | 636  | SLPVEGLKGPVEDI                    | 1.1     |
| "          | "                    | "          | Q6ZQN2_HUMAN        | 16 | 91   | 106  | LPKADIVSGPKVDI                    | 1.1     |
| "          | "                    | "          | Q6ZQN2_HUMAN        | 16 | 40   | 55   | PEVDIKGPVDIDAPD                   | 0.4     |
| "          | "                    | "          | Q6ZQN2_HUMAN        | 16 | 828  | 843  | PDVNIIEGPDALKGPK                  | 0.31    |
| "          | "                    | "          | Q13727_HUMAN        | 33 | 160  | 192  | KGDVDSLPGVEGLKGPVEDIKGPVDIDAPD    | 4.5e-11 |
| "          | "                    | "          | Q13727_HUMAN        | 27 | 26   | 52   | LKGPVKMGDVSLSLPGVEGLKGPVE         | 1.3e-07 |
| "          | "                    | "          | Q13727_HUMAN        | 27 | 106  | 132  | DVSGPKVDIVPDVNIIEGPDALKGPK        | 7.7e-08 |
| "          | "                    | "          | Q13727_HUMAN        | 19 | 288  | 306  | KGDVDSLPGVEGLKGPVE                | 4.1e-03 |
| "          | "                    | "          | Q13727_HUMAN        | 16 | 502  | 517  | SLPVEGLKGPVEDI                    | 0.28    |
| "          | "                    | "          | Q8N274_HUMAN        | 29 | 683  | 711  | KGDVDSLPGVEGLKGPVEDIKGPVDI        | 2.4e-08 |
| "          | "                    | "          | Q8N274_HUMAN        | 15 | 751  | 765  | LPKADIVSGPKVDI                    | 2.0     |
| "          | "                    | "          | AHNK_HUMAN (Q09666) | 36 | 4138 | 4173 | LKGPVKMGDVSLSLPGVEGLKGPVEDIKGPVDI | 2.2e-11 |
| "          | "                    | "          | AHNK_HUMAN (Q09666) | 33 | 2722 | 2754 | KGDVDSLPGVEGLKGPVEDIKGPVDIDAPD    | 8.5e-10 |
| "          | "                    | "          | AHNK_HUMAN (Q09666) | 33 | 4272 | 4304 | KGDVDSLPGVEGLKGPVEDIKGPVDIDAPD    | 8.5e-10 |
| "          | "                    | "          | AHNK_HUMAN (Q09666) | 29 | 2594 | 2622 | KGDVDSLPGVEGLKGPVEDIKGPVDI        | 2.3e-07 |
| "          | "                    | "          | AHNK_HUMAN (Q09666) | 27 | 4218 | 4244 | DVSGPKVDIVPDVNIIEGPDALKGPK        | 1.3e-06 |
| "          | "                    | "          | AHNK_HUMAN (Q09666) | 25 | 3691 | 3715 | VSLPGVEGLKGPVEDIKGPVDI            | 3.9e-05 |
| "          | "                    | "          | AHNK_HUMAN (Q09666) | 19 | 3052 | 3070 | DVSGPKVDIVPDVNIIEGP               | 3.7e-02 |
| "          | "                    | "          | AHNK_HUMAN (Q09666) | 19 | 3834 | 3852 | DVSGPKVDIVPDVNIIEGP               | 3.7e-02 |
| "          | "                    | "          | AHNK_HUMAN (Q09666) | 19 | 4400 | 4418 | KGDVDSLPGVEGLKGPVE                | 6.0e-02 |

|   |   |                     |    |      |      |                    |         |
|---|---|---------------------|----|------|------|--------------------|---------|
| " | " | AHNK_HUMAN (Q09666) | 18 | 3189 | 3206 | DVPDVNIEGPDALKKGP  | 9.7e-02 |
| " | " | AHNK_HUMAN (Q09666) | 18 | 3569 | 3586 | EGDLKGPEVDIKGPKVDI | 0.16    |
| " | " | AHNK_HUMAN (Q09666) | 18 | 3641 | 3658 | DVPDVNIEGPDALKKGP  | 9.7e-02 |
| " | " | AHNK_HUMAN (Q09666) | 18 | 3771 | 3788 | EGDLKGPEVDIKGPKVDI | 0.16    |
| " | " | AHNK_HUMAN (Q09666) | 18 | 3971 | 3988 | DVPDVNIEGPDALKKGP  | 9.7e-02 |
| " | " | AHNK_HUMAN (Q09666) | 18 | 4691 | 4708 | DVPDVNIEGPDALKKGP  | 9.7e-02 |
| " | " | AHNK_HUMAN (Q09666) | 17 | 1596 | 1612 | DVDVSLPKVEGDLKGPE  | 0.88    |
| " | " | AHNK_HUMAN (Q09666) | 17 | 1422 | 1438 | VPDVNIEGPDALKGPE   | 0.42    |
| " | " | AHNK_HUMAN (Q09666) | 16 | 2984 | 2999 | SLPKVEGDLKGPEVDI   | 3.8     |
| " | " | AHNK_HUMAN (Q09666) | 16 | 4033 | 4048 | PEVDIKGPKVDIDAPD   | 1.4     |
| " | " | AHNK_HUMAN (Q09666) | 16 | 4084 | 4099 | LPKADIDVSGPKVDID   | 3.8     |
| " | " | AHNK_HUMAN (Q09666) | 16 | 4614 | 4629 | SLPKVEGDLKGPEVDI   | 3.8     |
| " | " | AHNK_HUMAN (Q09666) | 16 | 4802 | 4817 | VSLPKADIDVSGPKVD   | 6.2     |
| " | " | AHNK_HUMAN (Q09666) | 16 | 4821 | 4836 | PDVNIEGPDALKKGP    | 1.1     |

**Supplementary Table 10.** Host matches in *P. knowlesi* variant proteins with those of African green monkey, macaque and human.

\* Match start and end coordinates are given for the match region on the protein hit.  
 Blast e values are quoted for the exact match region against UniProt (release 12.6).  
 For ENSMMUP0000024593 and ENSMMUP0000037351 Blast e values are quoted for the exact match region against the Ensembl database (release 48).  
 A minimum identical match of 15 amino acids long was used.

O02788\_CERA = CD99-cos7 (Fragment)  
 ENSMMUP0000024593= CD99  
 Q6ICV7= CD99 protein (Fragment)

Q8N274\_HUMAN= FLJ33834 fis clone CTON2004264, moderately similar to neuroblast differentiation associated protein.  
 Q13727= AHNK-related protein  
 Q6ZQN2\_HUMAN= FLJ46846 fis, clone UTERU3004635, moderately similar to neuroblast differentiation associated protein AHNK (Fragment)  
 AHNK\_HUMAN= Neuroblast differentiation-associated protein AHNK (Desmoyokin)(Fragments)  
 ESMMUP0000037351= AHNK
